# Supplementary material for: Internet-Delivered Cognitive Behavioral Therapy to Treat Insomnia: A Systematic Review and Meta-Analysis
Source: PubMed Central journal article supplement (PMC4750912; doi:10.1371/journal.pone.0149139), 2016-02-11
Supplement: pone.0149139.s003.pdf [file pone.0149139.s003.pdf]

## **S2 File. Search strategy**

### **PubMed**

("Randomized Controlled Trials as Topic"[Mesh] OR "Randomized Controlled Trial" [Publication Type] OR random\*) AND (cognitive therapy [mh:noexp] OR chti[tiab] OR chti-i[tiab] OR "cognitive behaviour" [tw] OR "cognitive behavior" [tw] OR "cognitive behavioural" [tw] OR "cognitive behavioral" [tw]) AND (sleep initiation and maintenance disorders [mh] OR insomnia [tw]) AND (internet [mh] OR internet [tiab] OR web [tiab] OR "web-based" [tiab] OR computer [tiab] OR online [tiab])

### **CINAHL**

MH (MH "Cognitive Therapy+") OR TI ( chti-i OR chti OR "cognitive behavioral" OR "cognitive behavioural" OR "cognitive behavior" OR "cognitive behaviour" ) OR AB ( chti-i OR chti OR "cognitive behavioral" OR "cognitive behavioural" OR "cognitive behavior" OR "cognitive behaviour" )

AND

TI ( web OR internet OR computer OR web-based OR online ) OR AB ( web OR internet OR computer OR web-based OR internet OR online )

AND

MH (MH "Insomnia") OR TI insomnia OR AB insomnia

AND

AB random\* OR TI random\*

### **Embase**

'insomnia'/exp OR insomnia:ab,ti AND 'cognitive therapy'/exp OR cognitive NEXT/1 behavior\* OR cognitive NEXT/1 behavi?r\* AND web:ab,ti OR internet:ab,ti OR computer:ab,ti OR online:ab,ti OR 'web based':ab,ti AND random\*:ab,ti

### **PsycInfo**

TX insomnia AND TX ( "cognitive behavior" OR "cognitive behaviour" OR "cognitive behavioural" OR "cognitive behavioral" ) AND TX ( web OR internet OR computer OR web-based OR online ) AND TX random\*

## **CENTRAL**

'\_insomnia in Title, Abstract, Keywords and "cognitive behavior" OR "cognitive behaviour" OR "cognitive behavioural" OR "cognitive behavioral" in Title, Abstract, Keywords and web OR internet OR computer OR web-based OR online in Title, Abstract, Keywords and random\* in Keywords in Trials'

## **WoS**

**TOPIC:** (insomnia) **AND TOPIC:** ("cognitive behavior" OR "cognitive behavioural" OR "cognitive behavioral" OR "cognitive behaviour") **AND TOPIC:**(web OR Internet OR computer OR web-based OR online) **AND TOPIC:** (random\*)

*Indexes=SCI-EXPANDED, CPCI-S Timespan=All years*
